# Supplementary material
Source: Elsevier journal article supplement (https://www.sciencedirect.com/science/article/pii/S1885585716302626)
Supplement: mmc1 [file S1885585716302626:mmc1.pdf]

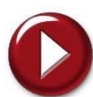

## **Supplementary material**

---

# **Awareness of Genetic Coronary Risk Score Improves Blood Pressure Control in Hypertensive Patients**

---

## SUPPLEMENTARY MATERIAL

## Table of the supplementary material.

## Ambulatory Blood Pressure Values at Baseline and Changes at the End Study

| Blood pressure, mmHg |          | Genetic risk score group<br>(n = 31) | Control group<br>(n = 36) | P*   |
|----------------------|----------|--------------------------------------|---------------------------|------|
| <b>Systolic</b>      |          |                                      |                           |      |
| 24 h                 | Baseline | 140.0 (138.03 to 51.07)              | 139.62 (130.92 to 48.32)  | .866 |
|                      | Change   | -16.31(-26.03 to -6.59)              | -14,52(-23.5 to -5.54)    | .442 |
| Daytime              | Baseline | 145.1 (156.3 to 133.9)               | 145.5 (154.5 to 136.5)    | .882 |
|                      | Change   | -18.43 (-28.72 to -8.14)             | -15.67 (-25.96 to -5.38)  | .290 |
| Nighttime            | Baseline | 127.3 (140.3 to 114.3)               | 126.7 (139.1 to 114.3)    | .846 |
|                      | Change   | -12.15 (-23.92 to -0.38)             | -11.58 (-22.44 to 1.02)   | .676 |
| <b>Diastolic</b>     |          |                                      |                           |      |
| 24 h                 | Baseline | 88.84 (96.14 to 81.54)               | 87.41 (94.51 to 80.31)    | .425 |
|                      | Change   | -10.96 (-18.88 to -3.04)             | -8.50 (-15.62 to 1.38)    | .118 |
| Daytime              | Baseline | 93.4 (100.5 to 86.3)                 | 92.3 (99.4 to 85.2)       | .552 |
|                      | Change   | -11.93 (-18.53 to -5.33)             | -9.11 (-17.0 to -1.21)    | .123 |
| Nighttime            | Baseline | 78.3 (87.5 to 61.1)                  | 76.4 (83.3 to 69.5)       | .347 |
|                      | Change   | -8.28 (-16.3 to -0.26)               | -7.88 (-15.29 to 0.47)    | .645 |

Data are expressed as mean (95% confidence interval). Changes for which the 95% confidence interval does not include 0 are significantly different from the baseline. \*P value for comparisons among groups with 1-way ANOVA.
